# Supplementary material
Source: PubMed Central journal article supplement (PMC10992873)

## Supplementary Figure 1

**PCA plots of correlations within NanoString samples.** **a**, PCA plot for 28 samples by individual patient. **b**, PCA plot for the 18 adenocarcinoma cases according to TP53 mutation status.

### Supplementary Figure 1

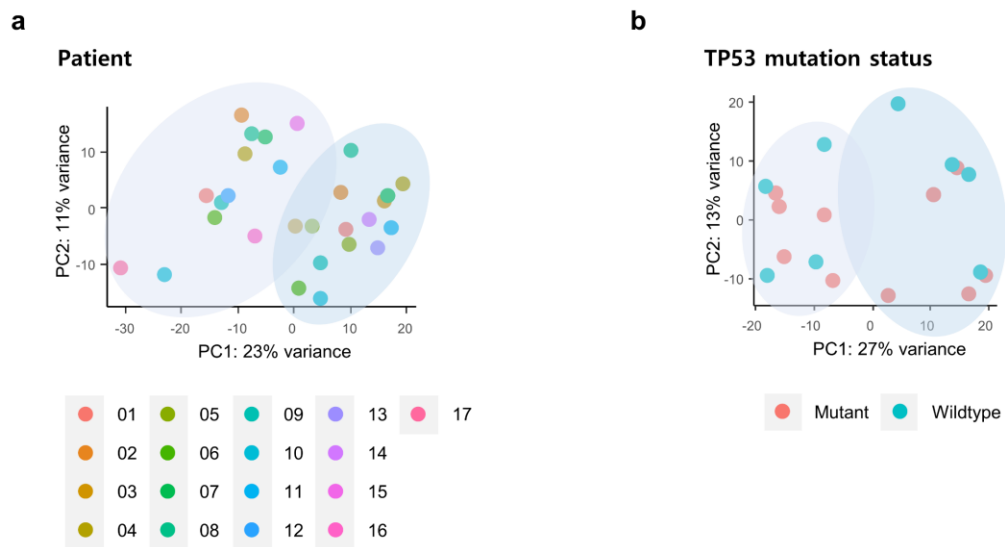

## Supplementary Figure 2

**Immunophenotypic differences in the lung and brain according to *EGFR* mutation status.** **a**, Immune scores in *EGFR* wild-type versus *EGFR* mutant primary lung samples (Mann–Whitney U-test). **b**, Immune scores in *EGFR* wild-type versus *EGFR* mutant LCBM cases (Mann–Whitney U-test). **c**, Immune scores in *EGFR* wild-type versus *EGFR* mutant LCBM adenocarcinoma cases with no previous tyrosine kinase inhibitor treatment (Mann–Whitney U-test). CT antigen, cancer/testis antigen; TLR, Toll-like receptor; ns, not significant.

## Supplementary Figure 2

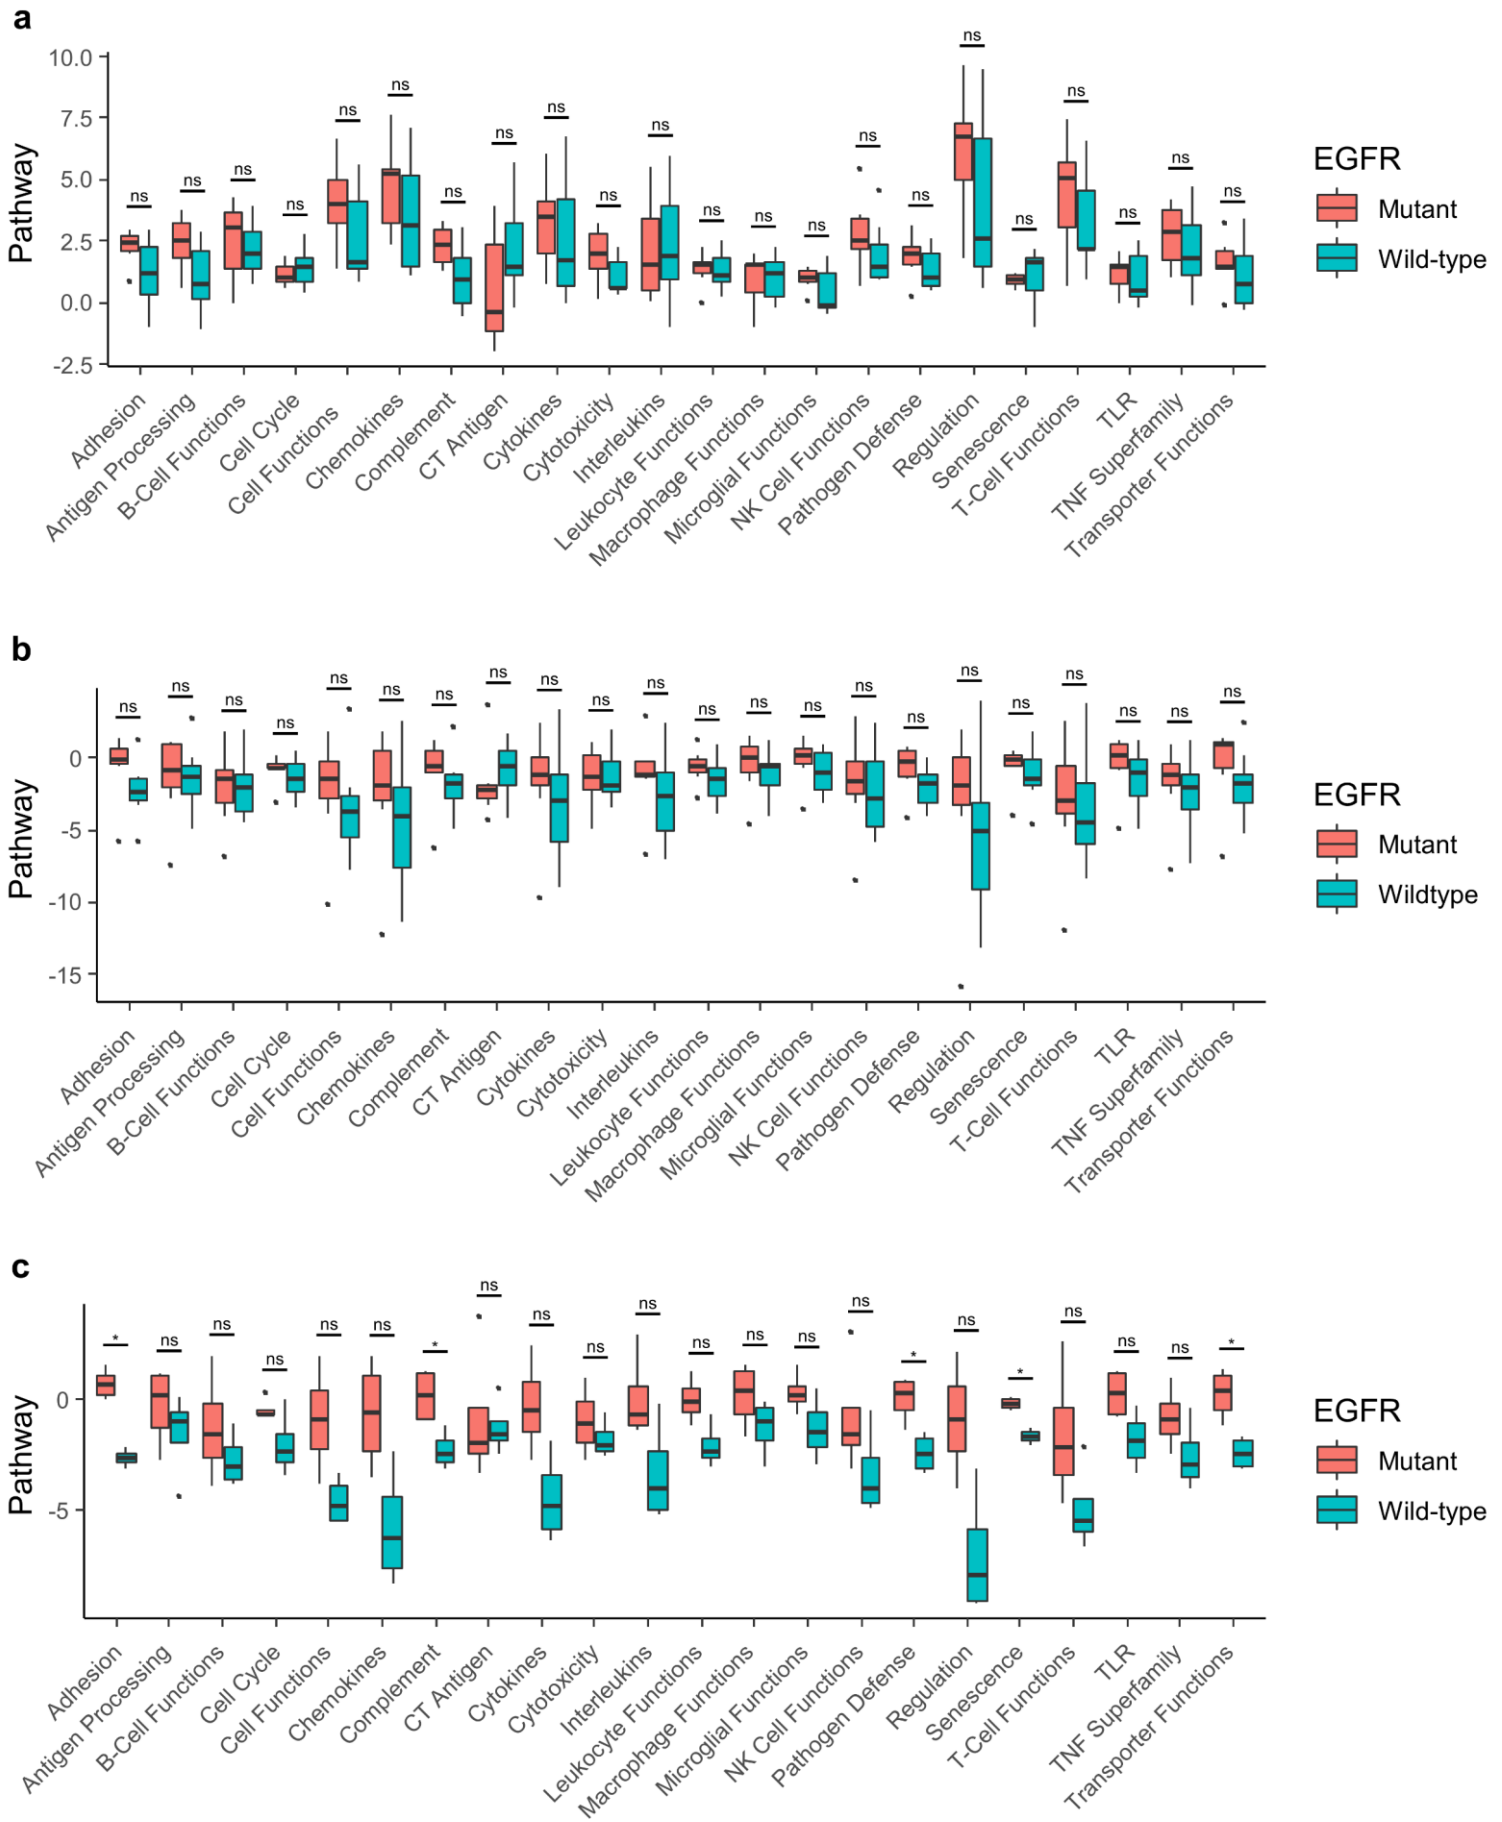

**Supplementary Figure 3**

**Comparative immunohistochemical images of CD3, NCR1, iNOS, and CD163 in representative primary lung and brain metastatic samples. Scale bar, 100  $\mu$ m.**

**Supplementary Figure 3**

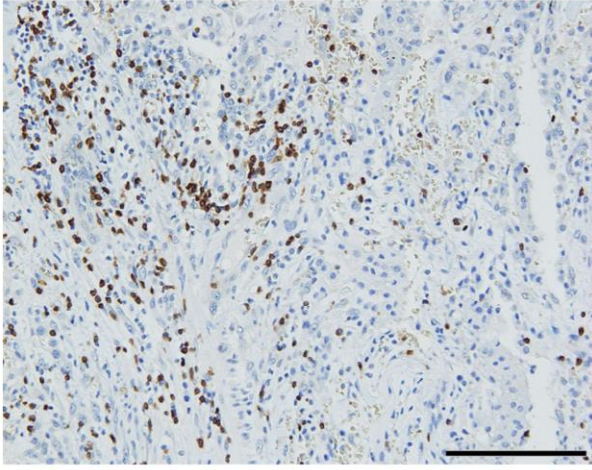

**CD3 lung**

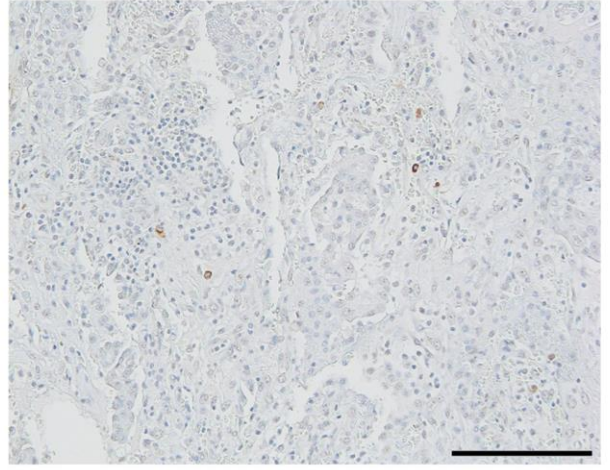

**NCR1 lung**

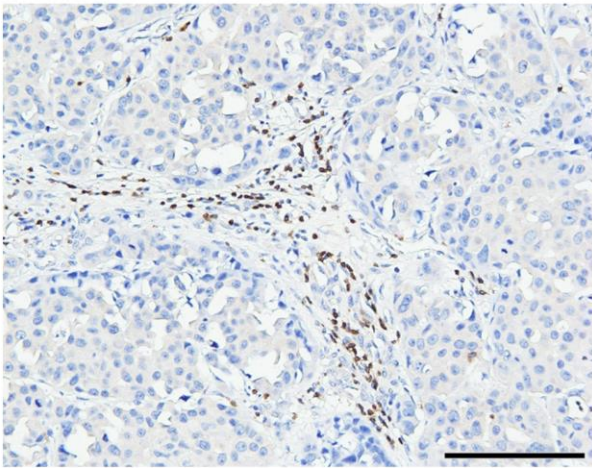

**CD3 brain**

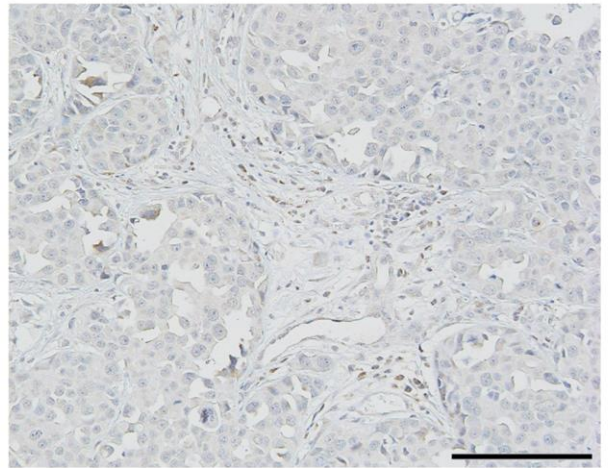

**NCR1 brain**

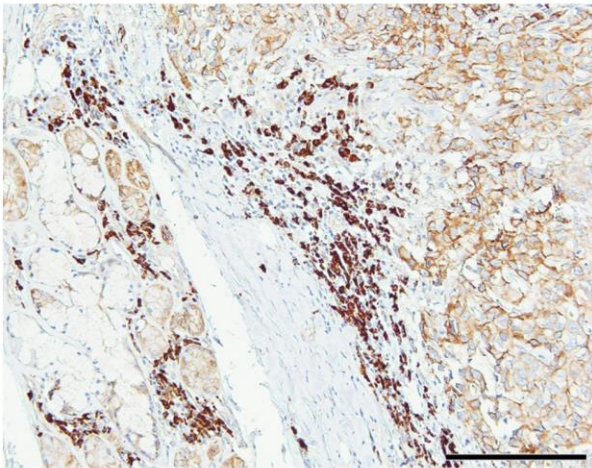

**iNOS lung**

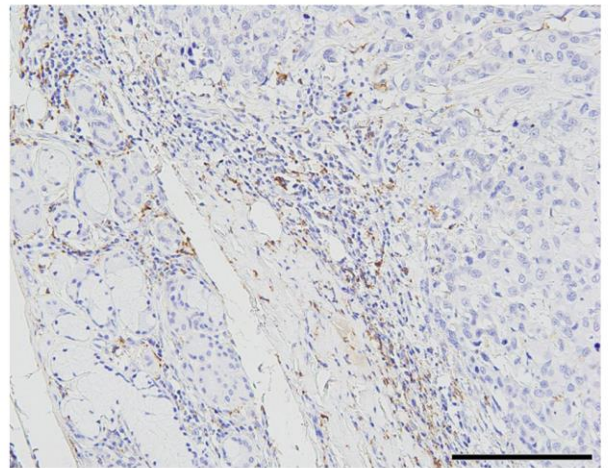

**CD163 lung**

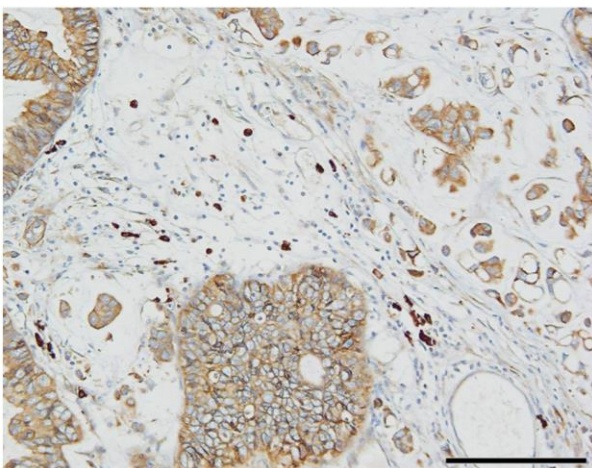

**iNOS brain**

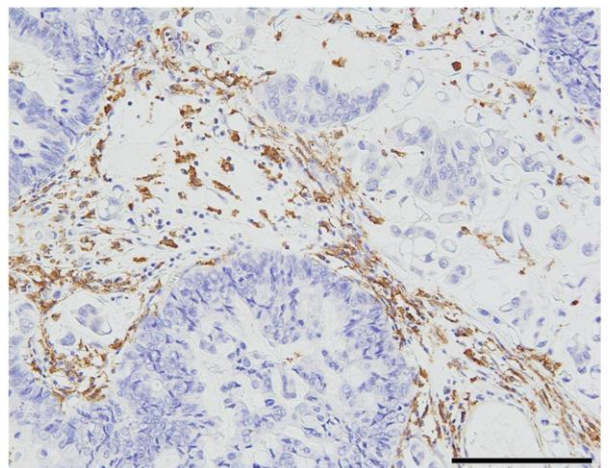

**CD163 brain**

#### **Supplementary Figure 4**

**Immune cell infiltration according to *EGFR* mutation status. a-b,** Immune cell profiles of lung (**a**) and brain (**b**) samples analyzed by the NanoString method (Mann–Whitney U-test). **c-d,** Relative abundance of immune cells per total tumor-infiltrating leukocytes in lung (**c**) and brain (**d**) samples by the NanoString method (Mann–Whitney U-test). ns, not significant.

# Supplementary Figure 4

**a**

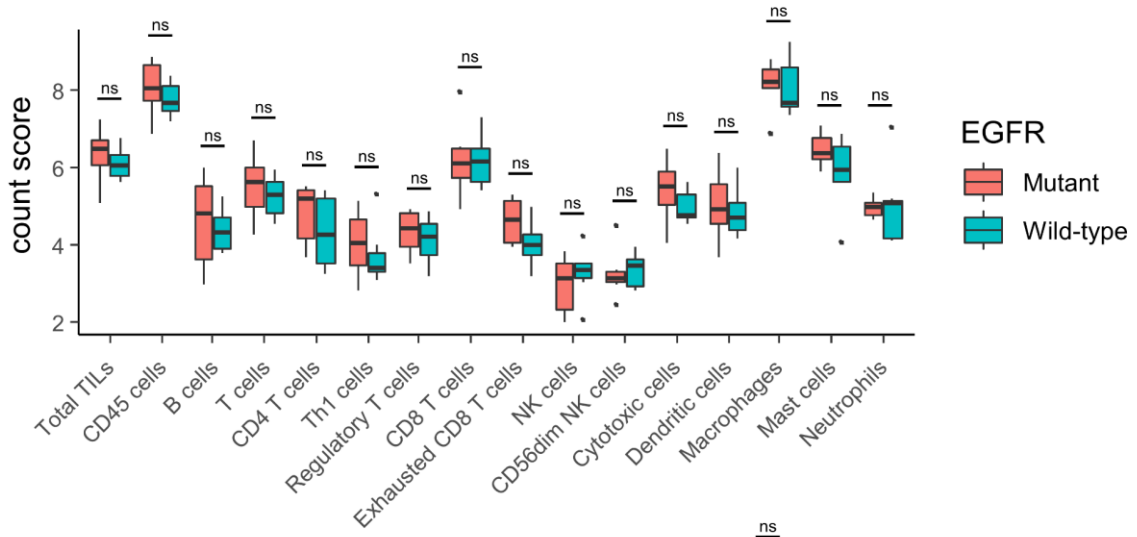

**b**

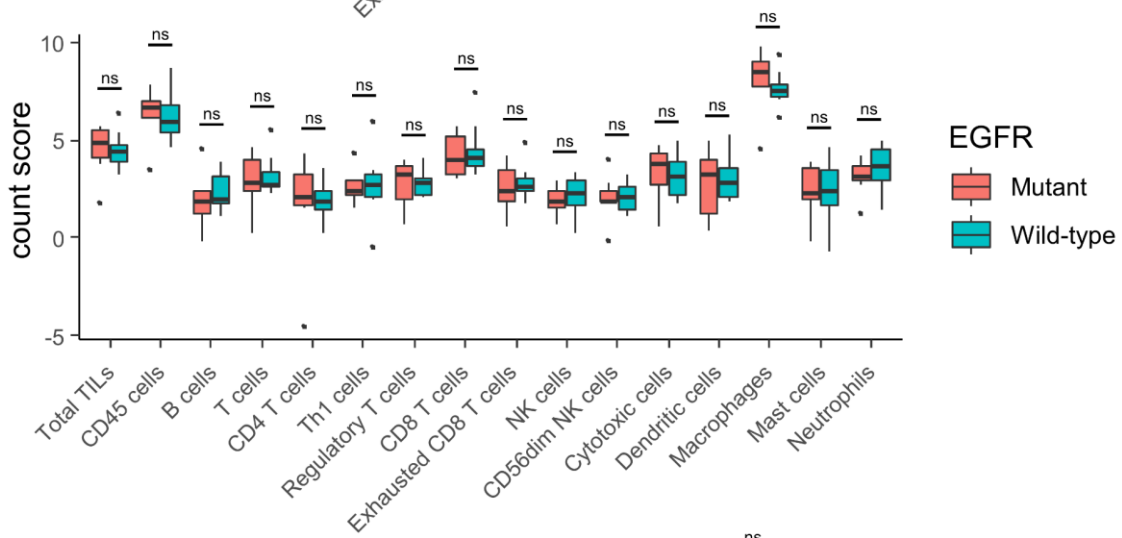

**c**

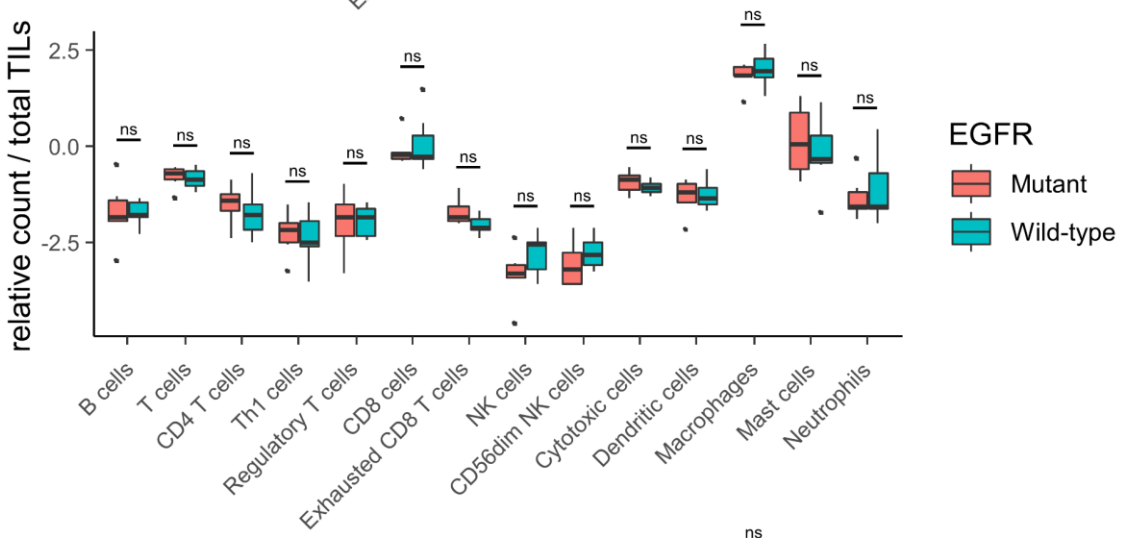

**d**

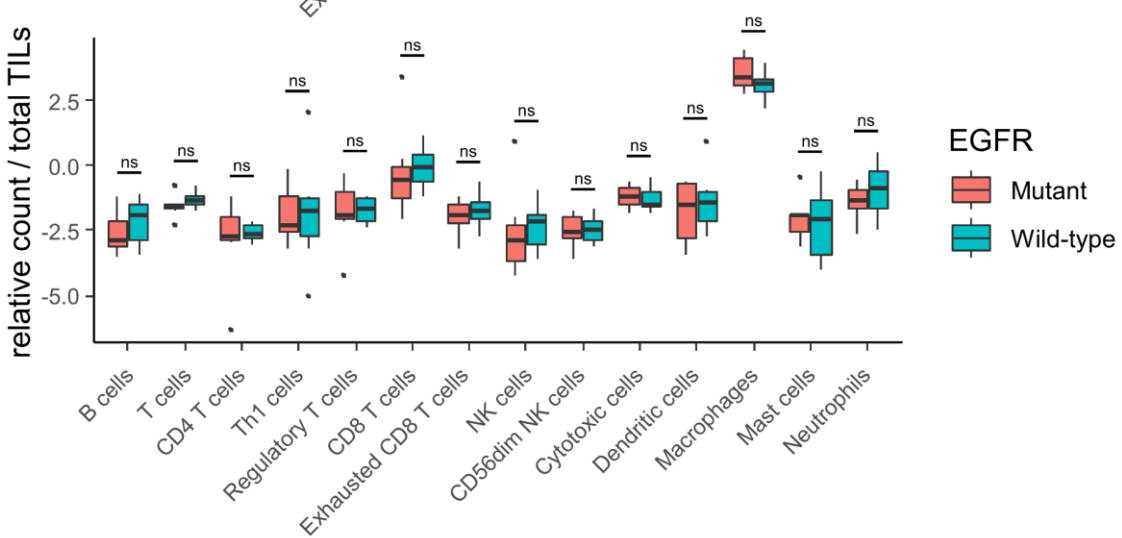

Supplement: 262_2020_2840_MOESM1_ESM.pdf [file 262_2020_2840_MOESM1_ESM.pdf]
